# Supplementary material for: Zr6O8 core cluster with formula unit [Zr6O4(OH)4(OH2)8(CH3COO)4(SO4)4]·nH2O obtained under mild conditions
Source: Royal Society of Chemistry journal article supplement (doi:10.1039/d4ra03940h), 2024-01-01
Supplement: d4ra03940h1.pdf [file d4ra03940h1.pdf]

**Zr<sub>6</sub>O<sub>8</sub> core cluster with formula unit**  
**[Zr<sub>6</sub>O<sub>4</sub>(OH)<sub>4</sub>(OH<sub>2</sub>)<sub>8</sub>(CH<sub>3</sub>COO)<sub>4</sub>(SO<sub>4</sub>)<sub>4</sub>] · nH<sub>2</sub>O obtained under mild**  
**conditions**

Andrea Y. Garzón-Serrano<sup>a</sup>, Johan D. Lozano<sup>b</sup>, Leon D. Perez,<sup>a</sup> César A. Sierra<sup>\*a</sup>, Mario A. Macías<sup>\*b</sup>

<sup>a</sup> Grupo de Investigación en Macromoléculas, Departamento de Química, Universidad Nacional de Colombia, Bogotá, 111321, Colombia.

<sup>b</sup> Crystallography and Chemistry of Materials, CrisQuimMat, Department of Chemistry, Universidad de los Andes, Bogotá, 111711, Colombia.

Corresponding authors: [casierraa@unal.edu.co](mailto:casierraa@unal.edu.co); [ma.maciasl@uniandes.edu.co](mailto:ma.maciasl@uniandes.edu.co)

**SUPPORTING INFORMATION**

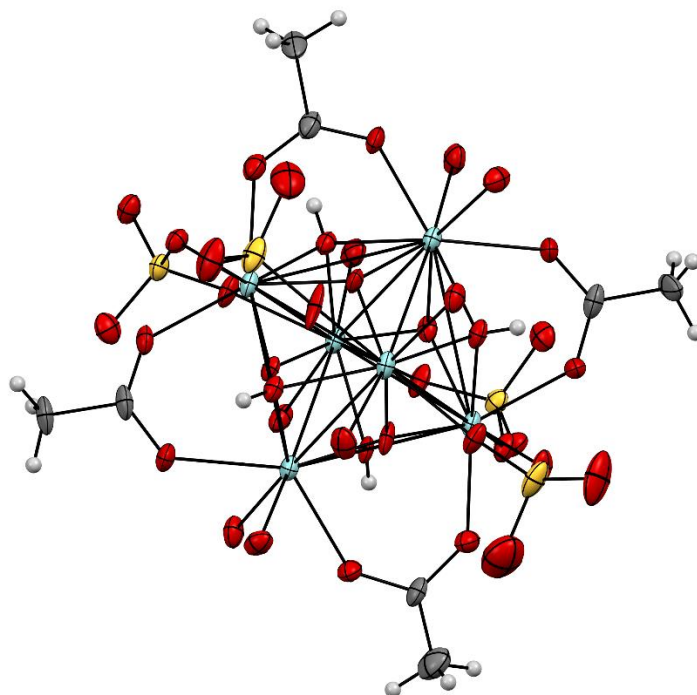

Figure S1. Molecular structure with anisotropic thermal vibration ellipsoids drawn at the 30% probability level. The hydrogen atoms are shown as spheres of arbitrary radius.

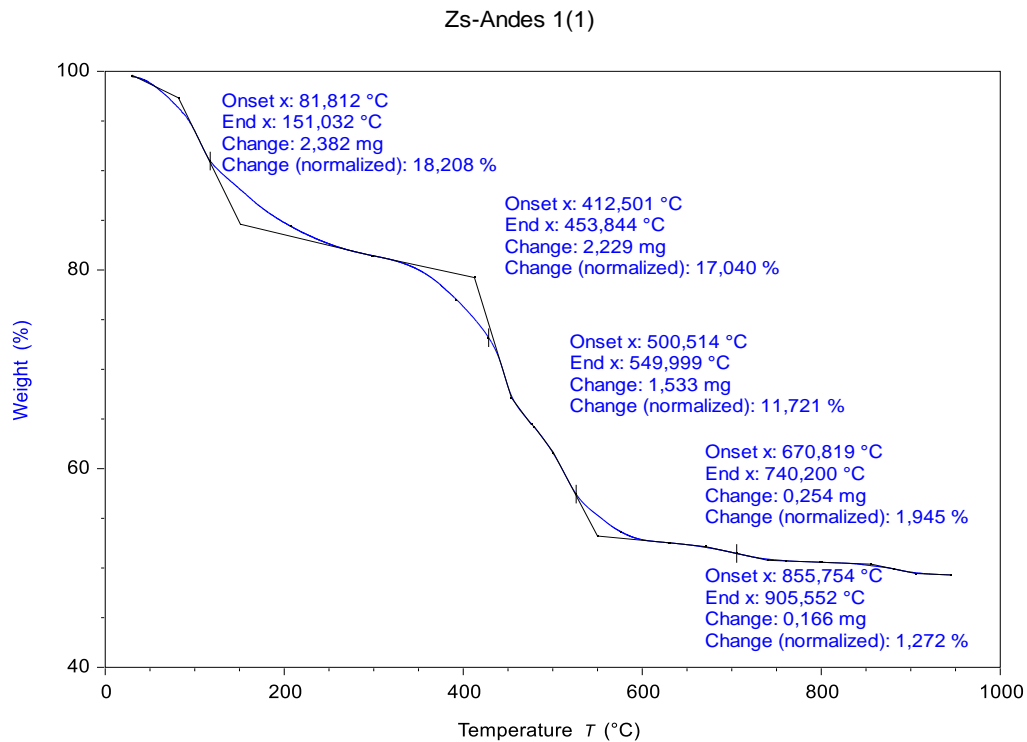

Figure S2. TGA diagram for  $[\text{Zr}_6\text{O}_4(\text{OH})_4(\text{OH}_2)_8(\text{CH}_3\text{COO})_4(\text{SO}_4)_4] \cdot 17\text{H}_2\text{O}$

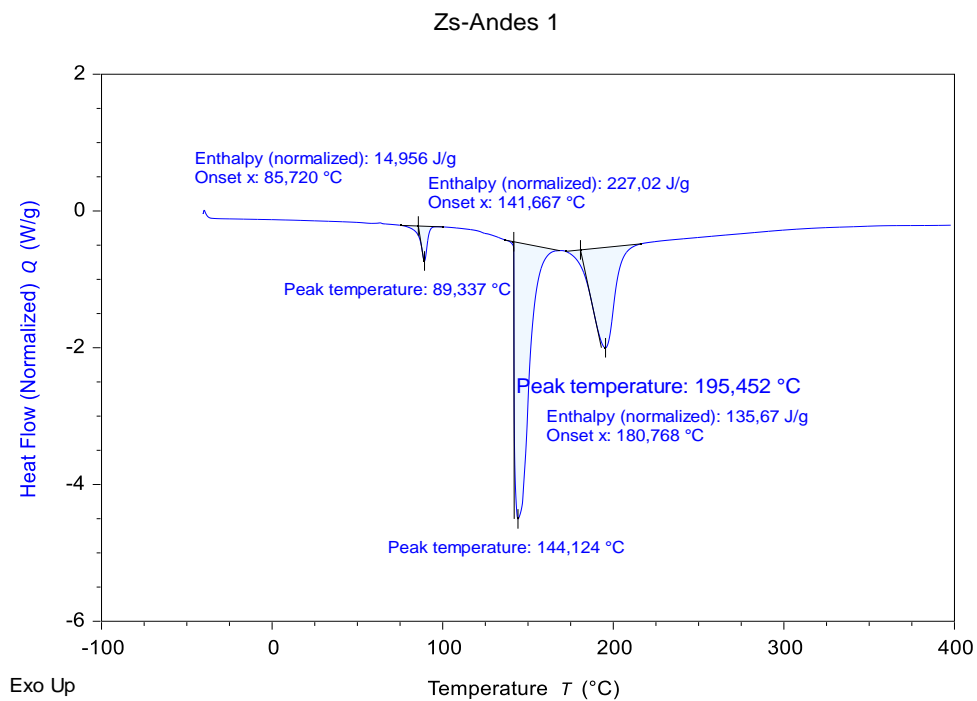

Figure S3. DSC diagram for  $[\text{Zr}_6\text{O}_4(\text{OH})_4(\text{OH}_2)_8(\text{CH}_3\text{COO})_4(\text{SO}_4)_4] \cdot 17\text{H}_2\text{O}$

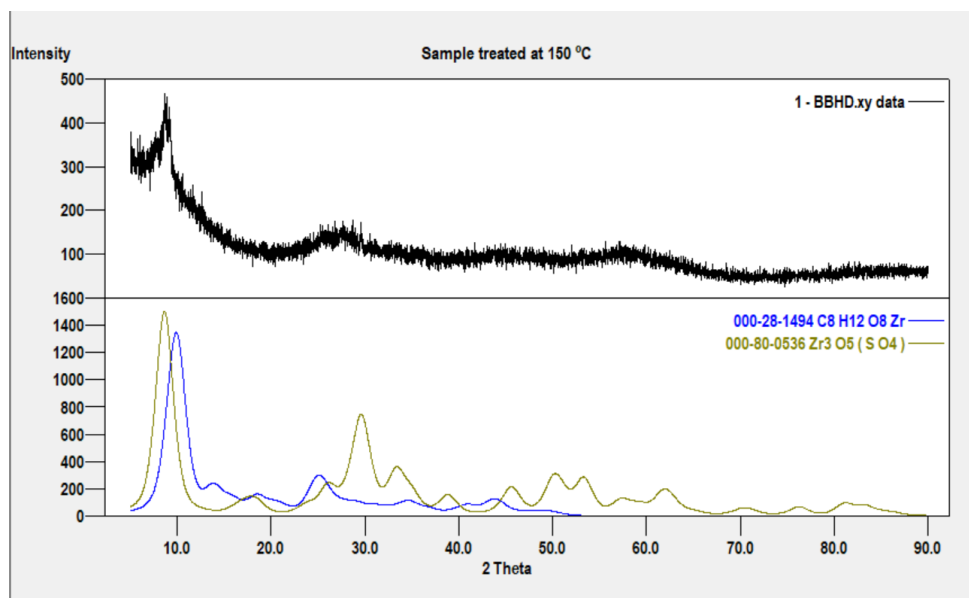

Figure S4. X ray diffractogram of the bulk sample treated at 150 °C of  $[\text{Zr}_6\text{O}_4(\text{OH})_4(\text{OH}_2)_8(\text{CH}_3\text{COO})_4(\text{SO}_4)_4] \cdot 17\text{H}_2\text{O}$ . Up: experimental diffractogram. Down: Diffractograms from the ICSD database.
